# Supplementary material for: CsPbX3/SiOx (X = Cl, Br, I) monoliths prepared via a novel sol–gel route starting from Cs4PbX6 nanocrystals
Source: Royal Society of Chemistry journal article supplement (doi:10.1039/c9nr07766a), 2019-01-01
Supplement: c9nr07766a2.pdf [file c9nr07766a2.pdf]

Supporting information

## **CsPbX<sub>3</sub>/SiO<sub>x</sub> (X=Cl, Br, I) Monoliths Prepared via a Novel Sol-gel route Starting from Cs<sub>4</sub>PbX<sub>6</sub> Nanocrystals**

Sungwook Park,<sup>‡a,b</sup> Ngoc Mai An,<sup>‡a,c</sup> Guilherme Almeida,<sup>a</sup> Francisco Palazon,<sup>d</sup> Davide Spirito,<sup>e</sup> Roman Krahne,<sup>a</sup> Zhiya Dang,<sup>a</sup> Luca de Trizio<sup>a</sup> and Liberato Manna<sup>\*a</sup>

<sup>a</sup>Nanochemistry Department, Istituto Italiano di Tecnologia, Via Morego 30, 16163 Genova, Italy. E-mail: liberato.manna@iit.it

<sup>b</sup>Department of Physics, Pukyong National University, Busan 608-737, Korea

<sup>c</sup>Dipartimento di Chimica e Chimica Industriale, Università degli Studi di Genova, Via Dodecaneso, 31, 16146, Genova, Italy

<sup>d</sup>Instituto de Ciencia Molecular, ICMol, Universidad de Valencia, C/ Catedrático J. Beltrán 2, 46980 Paterna, Spain

<sup>e</sup>IHP – Leibniz-Institut für innovative Mikroelektronik, Im Technologiepark 25, D-15236 Frankfurt (Oder), Germany

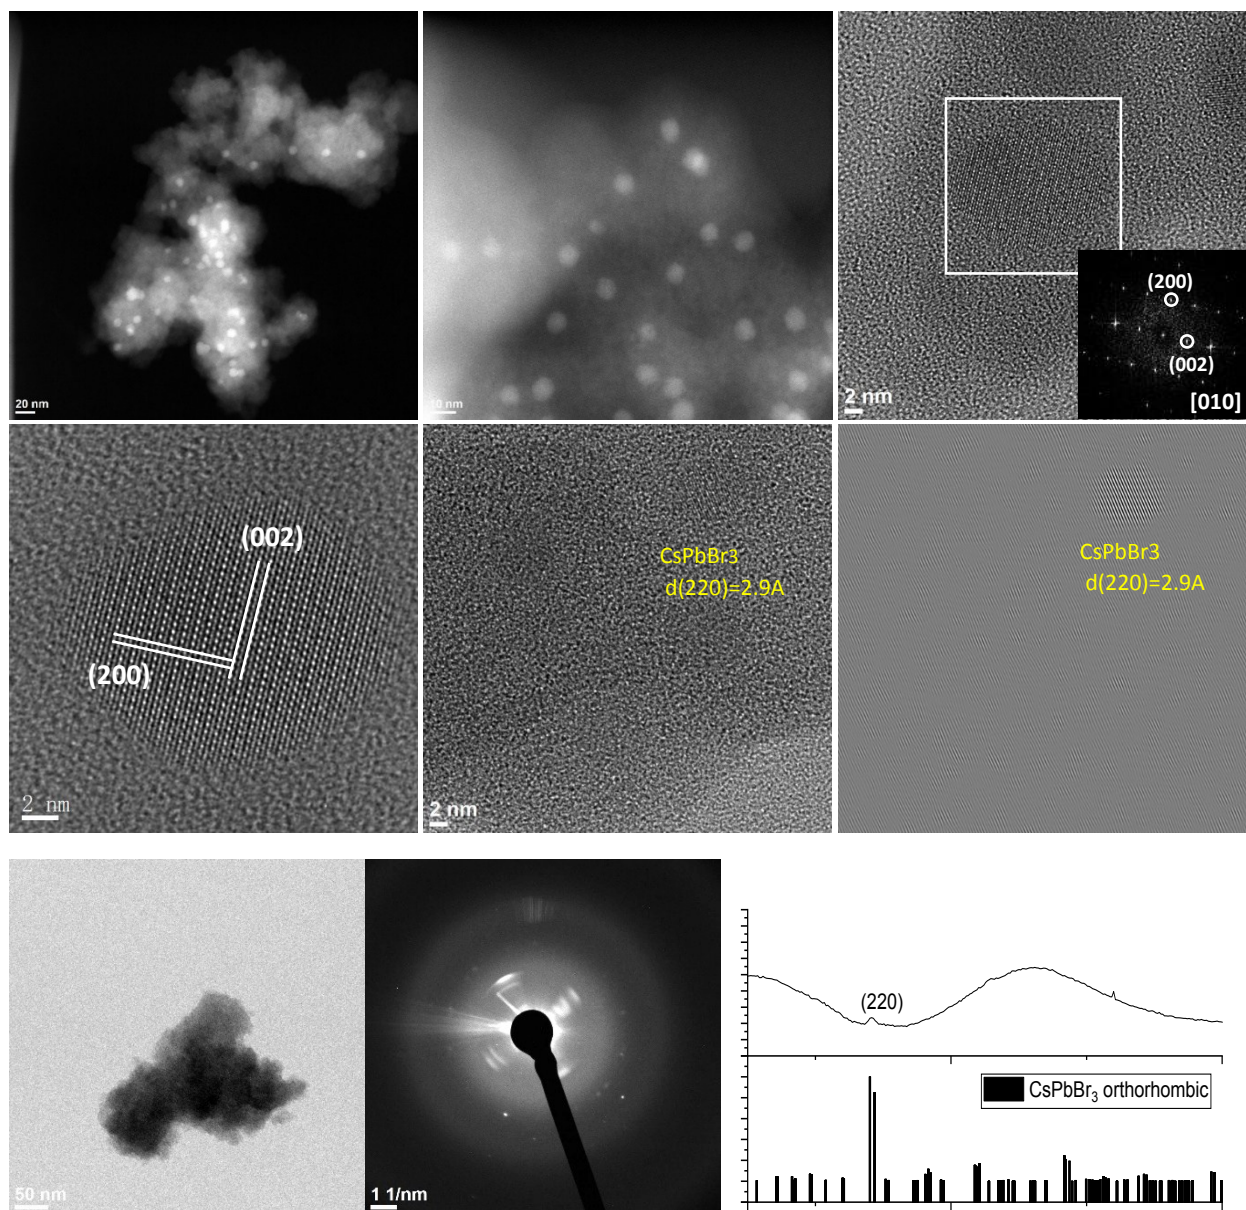

**Fig. S1.** HAADF-STEM images, HR-TEM images (inset shows the FFT analysis) and filtered HR-TEM image, SAED pattern and corresponding Azimuthal integration in comparison with reference cards for the orthorhombic  $\text{CsPbBr}_3$  phase of  $\text{CsPbBr}_3/\text{SiO}_x$  composite.

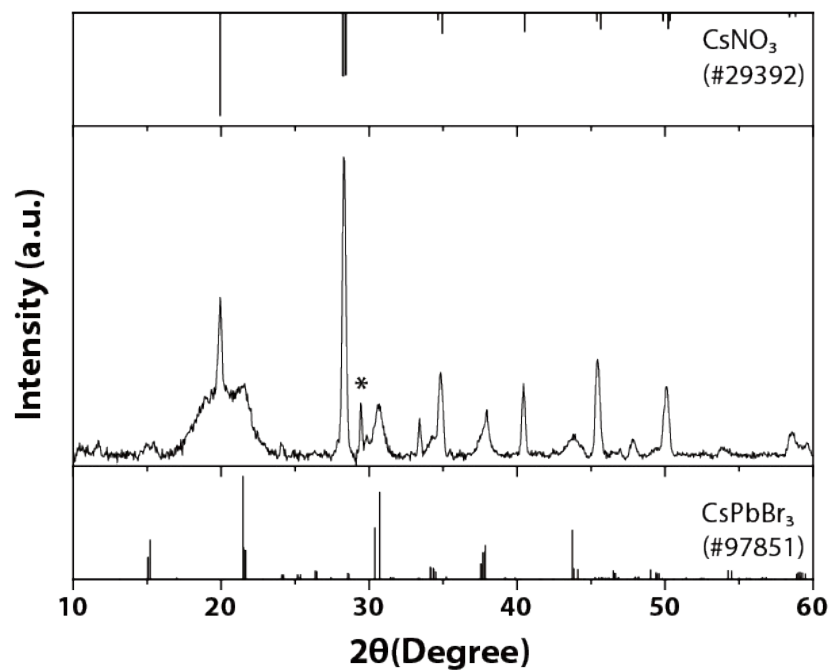

**Fig. S2.** XRD pattern of the product of the reaction between  $\text{Cs}_4\text{PbBr}_6$  NCs and  $\text{HNO}_3$ . The sample consists of a mixture of  $\text{CsPbBr}_3$ ,  $\text{CsNO}_3$  and  $\text{CsBr}$  (The asterisk indicates the main peak of  $\text{CsBr}$ ).

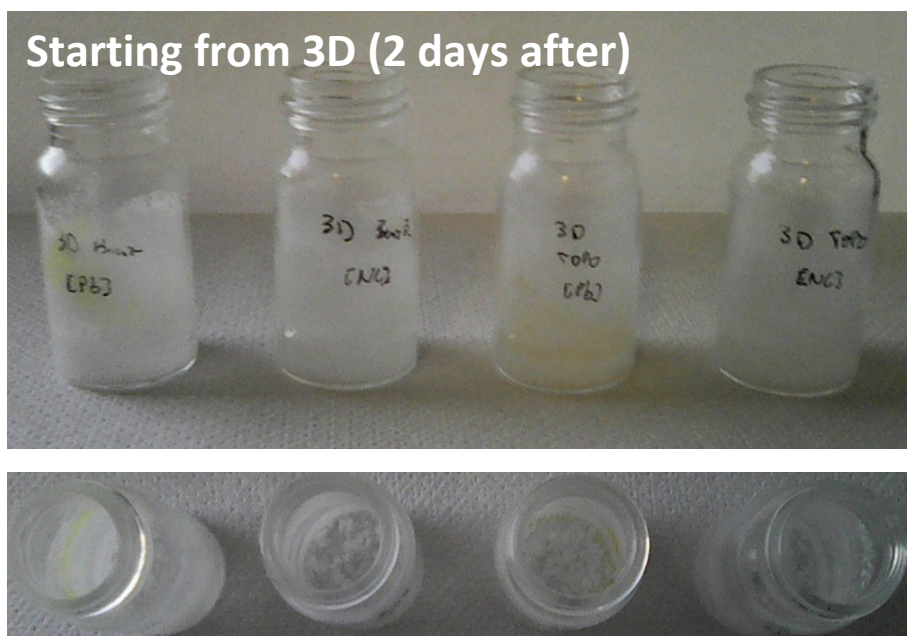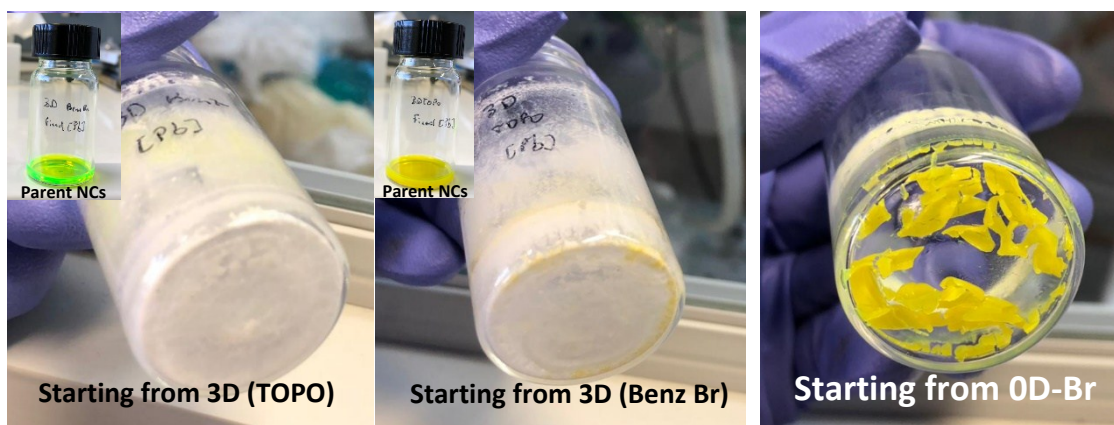

- Only white powders (no emission) were obtained by using  $\text{CsPbBr}_3$  NCs
- Homogenous green emitting gel was obtained by using  $\text{Cs}_4\text{PbBr}_6$  NCs

**Fig. S3.** Comparative experiment of sol-gel process starting from oD and 3D NCs.

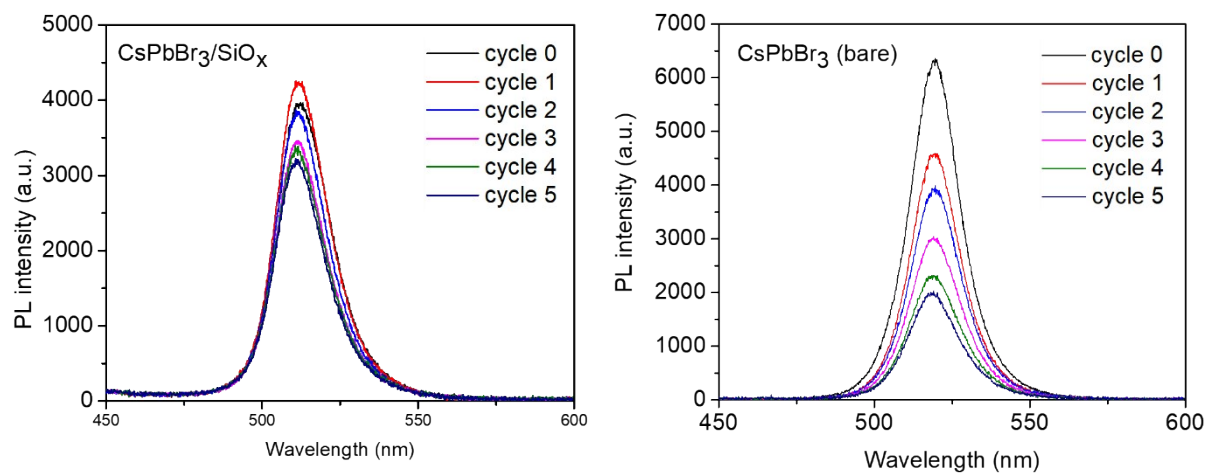

**Fig. S4.** Thermal stability test: PL spectrum of CsPbBr<sub>3</sub>/SiO<sub>x</sub> composite (left) and bare CsPbBr<sub>3</sub> NCs (right) were recorded at RT after each heat-up/cool-down cycle

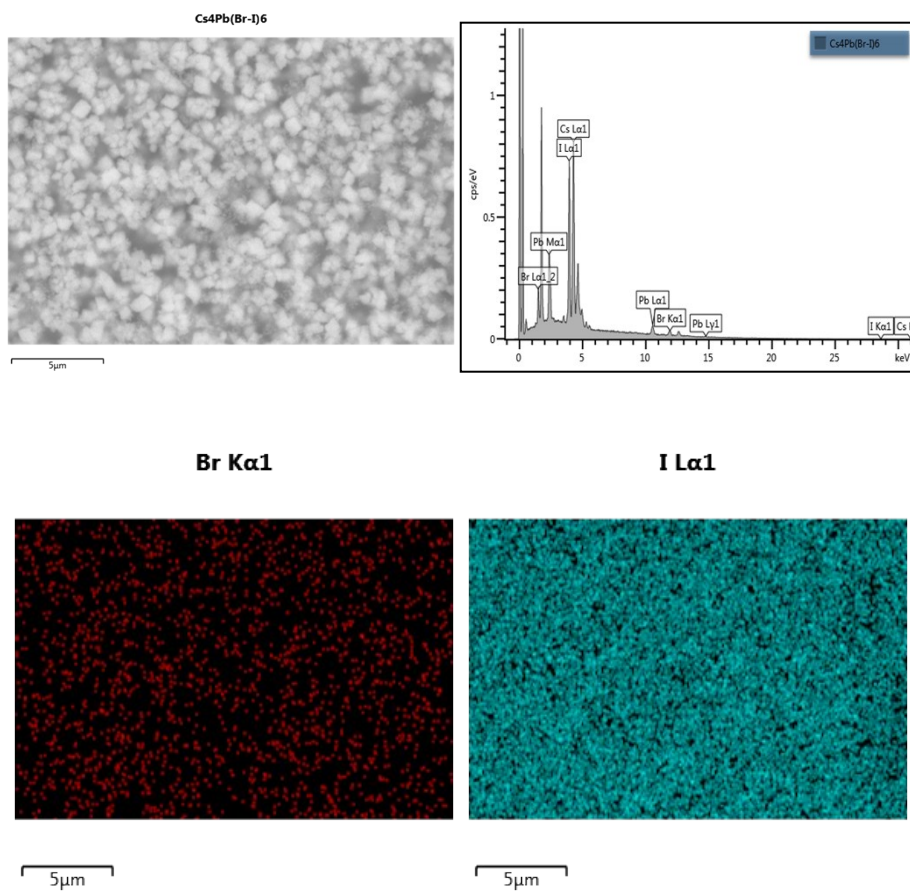

| Cs <sub>4</sub> Pb(Br-I) <sub>6</sub> | Line Type | Wt%    | Wt% Sigma | Atomic % |
|---------------------------------------|-----------|--------|-----------|----------|
| <b>Br</b>                             | K series  | 10.84  | 0.92      | 16.18    |
| <b>I</b>                              | L series  | 89.16  | 0.92      | 83.82    |
| <b>Total</b>                          |           | 100.00 |           | 100.00   |

**Fig. S5.** EDS elemental mappings of the halide anions of Cs<sub>4</sub>Pb(Br,I)<sub>6</sub> system. The bromine and iodine distribution was visualized.

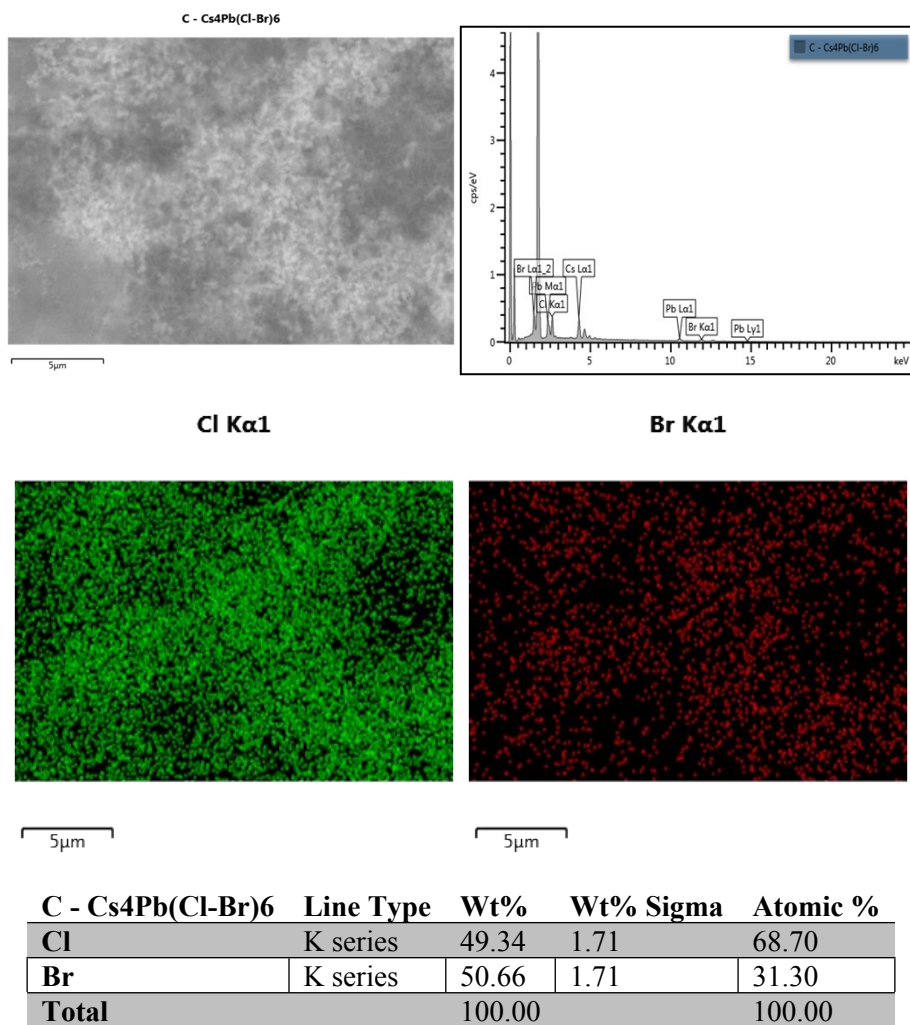

**Fig. S6.** EDS elemental mappings of the halide anions of Cs<sub>4</sub>Pb(Cl,Br)<sub>6</sub> system. The chlorine and bromine distribution was visualized.

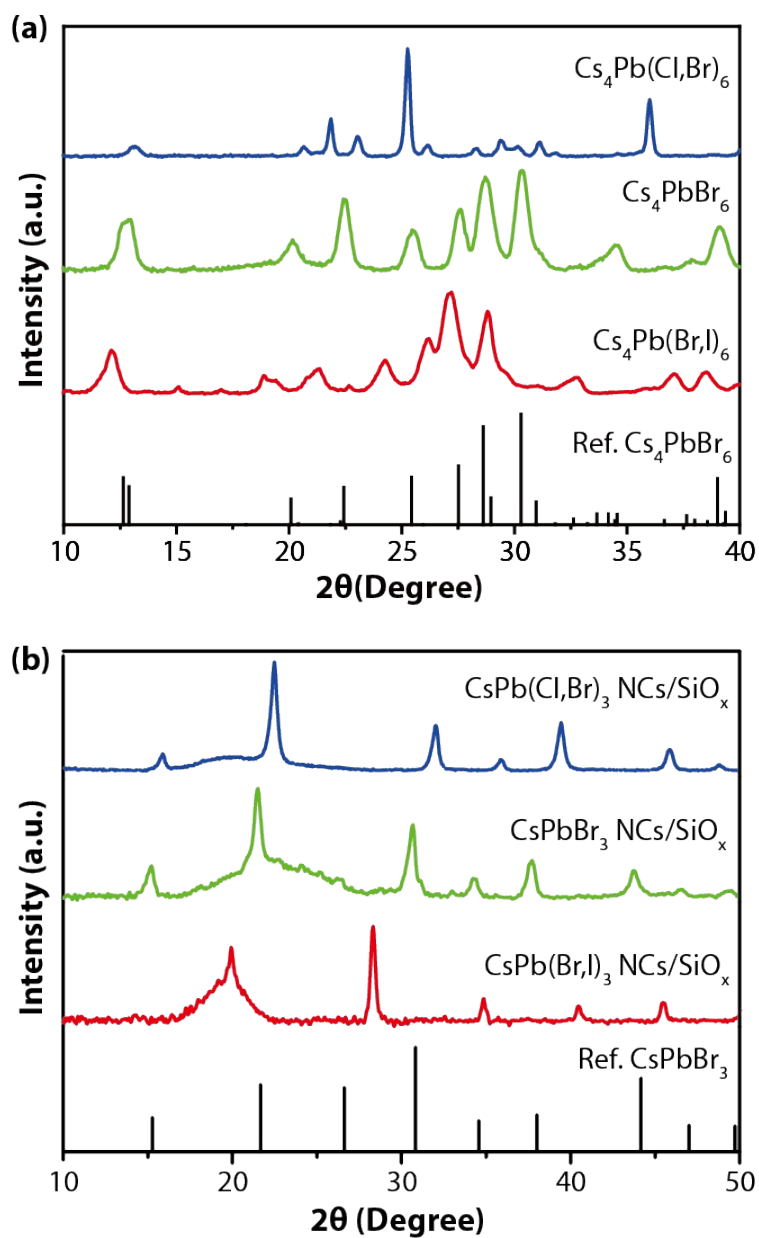

**Fig. S7.** XRD patterns of (a)  $\text{Cs}_4\text{PbX}_6$  NCs and (b)  $\text{CsPbBr}_3/\text{SiO}_x$  matching with the  $\text{Cs}_4\text{PbBr}_6$  (98-002-5124) and  $\text{CsPbBr}_3$  reference patterns (98-018-1287).

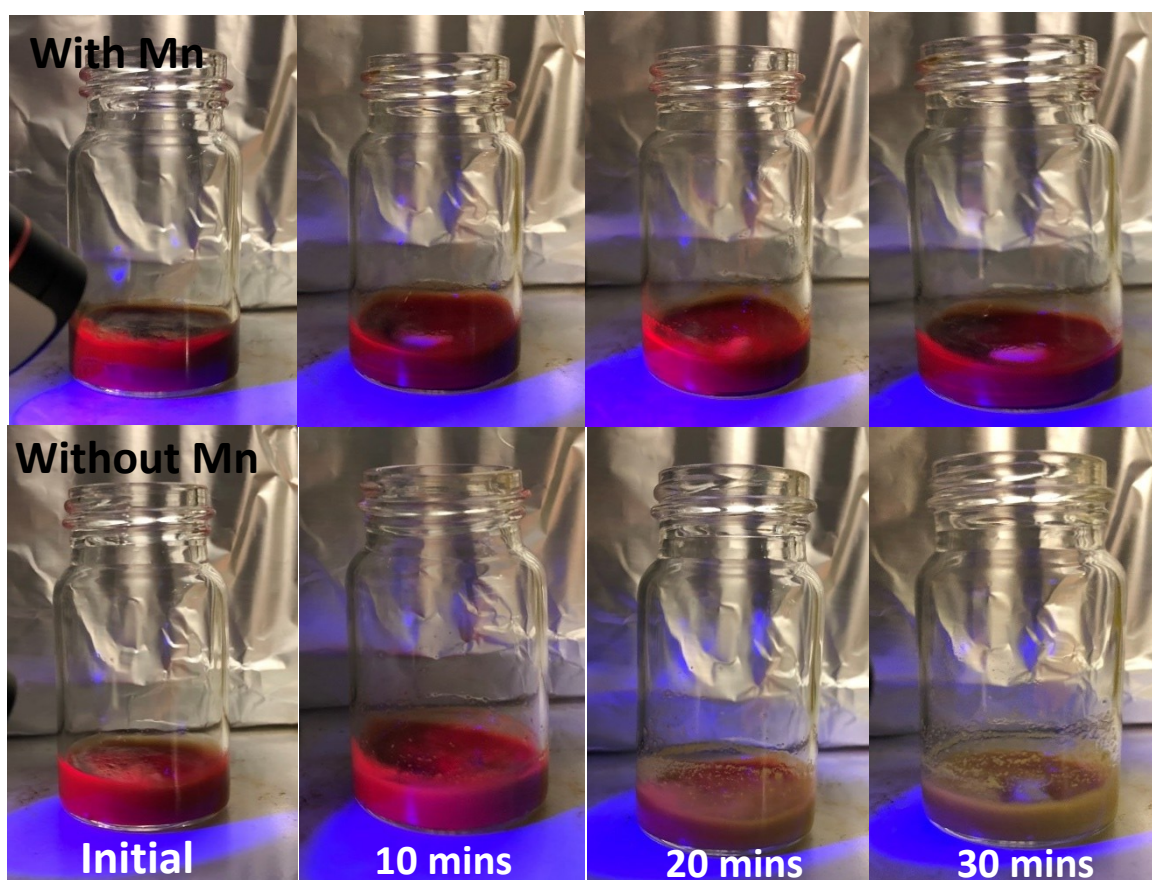

- In the absence of  $\text{Mn}^{2+}$  ions the mixture solution turned into brown and did not exhibit any PL emission.

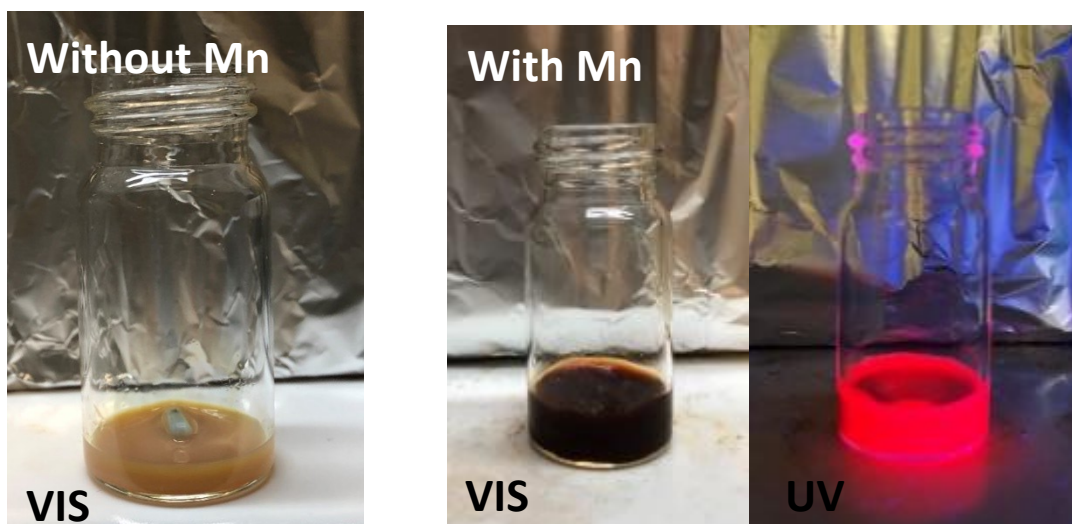

**Fig. S8.** Visualization of Mn-doped/non-doped  $\text{CsPb}(\text{Br},\text{I})_3/\text{SiO}_x$  gelation process.
